# Supplementary material
Source: PubMed Central journal article supplement (PMC8405201)
Supplement: NIHMS1734040-supplement-Supplementary_Information.pdf [file NIHMS1734040-supplement-Supplementary_Information.pdf]

# Supplementary Information

## Universal Spectrum Identifier for mass spectra

Eric W. Deutsch<sup>1,\*</sup>, Yasset Perez-Riverol<sup>2</sup>, Jeremy Carver<sup>3</sup>, Shin Kawano<sup>4</sup>, Luis Mendoza<sup>1</sup>, Tim Van Den Bossche<sup>5,6</sup>, Ralf Gabriels<sup>5,6</sup>, Pierre-Alain Binz<sup>7</sup>, Benjamin Pullman<sup>3</sup>, Zhi Sun<sup>1</sup>, Jim Shofstahl<sup>8</sup>, Wout Bittremieux<sup>9,10</sup>, Tytus D. Mak<sup>11</sup>, Joshua Klein<sup>12</sup>, Yunping Zhu<sup>13</sup>, Henry Lam<sup>14</sup>, Juan Antonio Vizcaíno<sup>2</sup>, and Nuno Bandeira<sup>3,9,\*</sup>

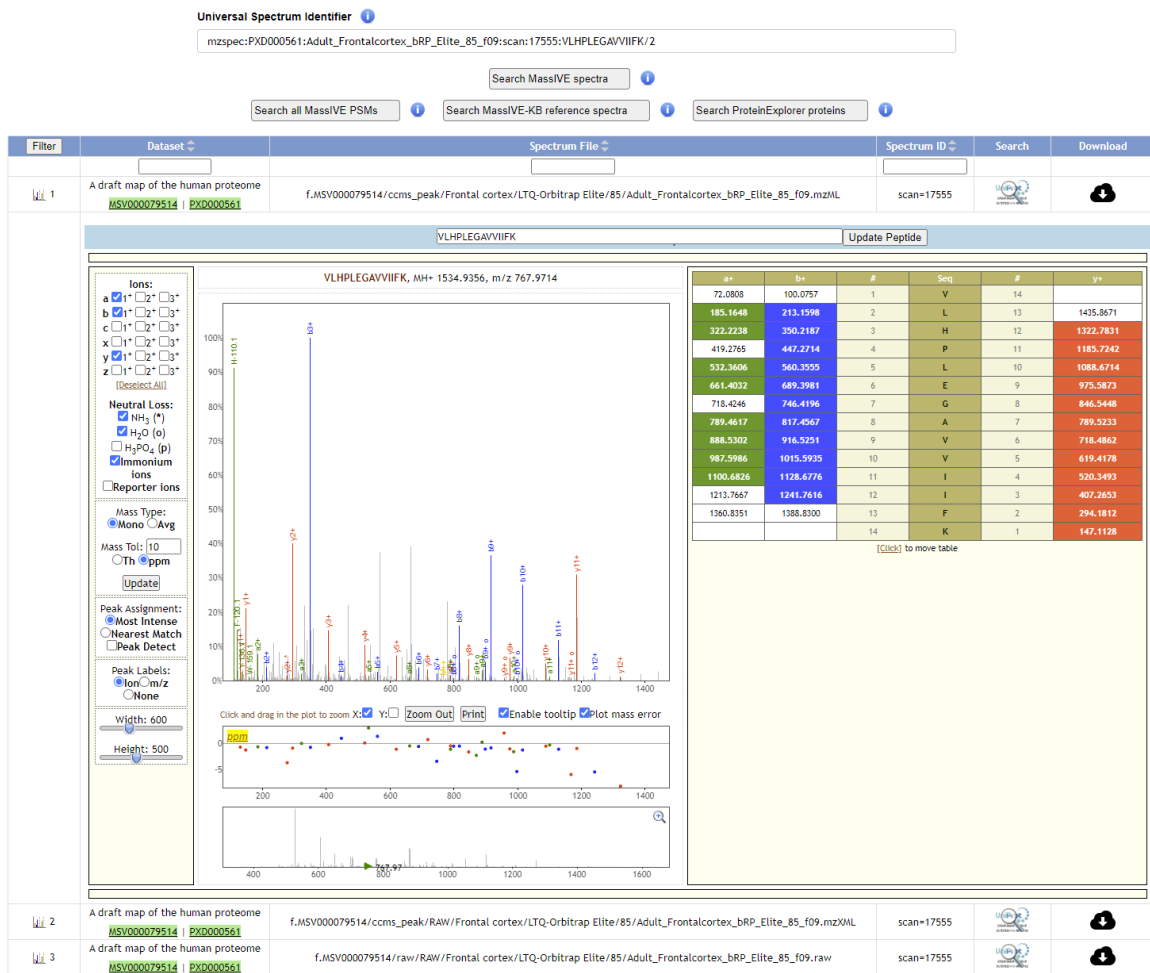

Figure S1. Main MassIVE functionality for resolution of Universal Spectrum Identifiers.

(a) Searching for all reported identifications of the USI spectrum

mzspec:PXD000561:Adult\_Frontalcortex\_bRP\_Elite\_85\_f09:scan:17555:VLHPLEGAVIIFK/2

| Filter | Dataset                                                                                                                                                                  | Spectrum File                                                                                                                                          | Spectrum ID                            | Peptide                        |
|--------|--------------------------------------------------------------------------------------------------------------------------------------------------------------------------|--------------------------------------------------------------------------------------------------------------------------------------------------------|----------------------------------------|--------------------------------|
| 1      | CPTAC proteomic analysis of TCGA colon and rectal carcinomas using standard and customized databases, part 1<br><a href="#">MSV000080147</a>   <a href="#">PXD002041</a> | TCGA-AA-3518-c<br>f.MSV000080147/peak/PEAK/TCGA-AA-3518-01A-11_W_VU_20120915_A0218_3F_R_FR04.mzML.gz                                                   | scan=9649<br><a href="#">scan=9649</a> | ADNQLRKDENGALIR                |
| 2      | MODa Re-analysis of CPTAC Patient 3518<br><a href="#">RMSV00000233.2</a>                                                                                                 | f.MSV000079852/peak/peak/ColorectalCancer/TCGA-AA-3518-01A-11_Proteome_VU_20120915/mzML_data/TCGA-AA-3518-01A-11_W_VU_20120915_A0218_3F_R_FR04.mzML.gz | <a href="#">scan=9649</a>              | A+28AVEEGIVLGGGC+57.021464ALLR |
| 3      | MODa Re-analysis of CPTAC Colorectal data<br><a href="#">RMSV00000004.4</a>   <a href="#">RPXD006619.4</a>                                                               | f.MSV000079852/peak/peak/ColorectalCancer/TCGA-AA-3518-01A-11_Proteome_VU_20120915/mzML_data/TCGA-AA-3518-01A-11_W_VU_20120915_A0218_3F_R_FR04.mzML.gz | <a href="#">scan=9649</a>              | A+28AVEEGIVLGGGC+57.021464ALLR |
| 4      | MAESTRO Re-analysis of CPTAC Patient 3518<br><a href="#">RMSV00000232.4</a>                                                                                              | f.MSV000080921/peak/TCGA-AA-3518-01A-11_Proteome_VU_20120915/mzML_data/TCGA-AA-3518-01A-11_W_VU_20120915_A0218_3F_R_FR04.mzML.gz                       | <a href="#">scan=9649</a>              | A+28AVEEGIVLGGGC+57ALLR        |
| 5      | Official Proteogenomic CPTAC Search Results<br><a href="#">RMSV00000234.3</a>   <a href="#">RPXD007509.3</a>                                                             | f.MSV000080147/peak/PEAK/TCGA-AA-3518-01A-11_W_VU_20120915_A0218_3F_R_FR04.mzML.gz                                                                     | <a href="#">scan=9649</a>              | ADNQLRKDENGALIR                |

(b) Searching MASSIVE-KB for reference spectra for the same peptide as in the USI

mzspec:PXD002041:TCGA-AA-3518-01A-11\_W\_VU\_20120915\_A0218\_3F\_R\_FR04:scan:9649:ADNQLRKDENGALIR/2

| Filter | Library            | Sequence    | Peptide Length | #Matched Proteins | #Matched Proteins w/ 0-1 SAAV Mismatch | Unique Exon Match | Exon Junction Match |
|--------|--------------------|-------------|----------------|-------------------|----------------------------------------|-------------------|---------------------|
| 1      | Bioplex Synthetics | PAPLLEEEKIR | 11             | 1                 | 1                                      | 1                 | 0                   |

(c) Searching Protein Explorer for proteins containing USI peptide

mzspec:PXD000865:00644\_H11\_P004899\_BOP\_A00\_R1:scan:3727:PAGDGTQK/2

| Apply Filters | Protein Accession      | Gene  | neXtprot Protein Existence | Total Unique Peptides | HUPO Peptides | Total Unique Exons | Total PSMs | Total Unique PSMs | Protein Description                                            |
|---------------|------------------------|-------|----------------------------|-----------------------|---------------|--------------------|------------|-------------------|----------------------------------------------------------------|
| Filter By:    |                        |       |                            |                       |               |                    |            |                   |                                                                |
| 1             | <a href="#">P01893</a> | HLA-H | 5                          | 8                     | 6             | 0                  | 4122       | 283               | Putative HLA class I histocompatibility antigen, alpha chain H |
| 2             | <a href="#">P04439</a> | HLA-A | 1                          | 79                    | 22            | 0                  | 7565       | 3683              | HLA class I histocompatibility antigen, A alpha chain          |
| 3             | <a href="#">P10321</a> | HLA-C | 1                          | 39                    | 18            | 0                  | 7753       | 2624              | HLA class I histocompatibility antigen, C alpha chain          |
| 4             | <a href="#">P13747</a> | HLA-E | 1                          | 81                    | 30            | 0                  | 4864       | 2425              | HLA class I histocompatibility antigen, alpha chain E          |
| 5             | <a href="#">P17693</a> | HLA-G | 1                          | 22                    | 9             | 0                  | 1592       | 416               | HLA class I histocompatibility antigen, alpha chain G          |
| 6             | <a href="#">P30511</a> | HLA-F | 1                          | 34                    | 21            | 0                  | 2175       | 1501              | HLA class I histocompatibility antigen, alpha chain F          |

Figure S2. Advanced MASSIVE functionality for resolution of Universal Spectrum Identifiers.

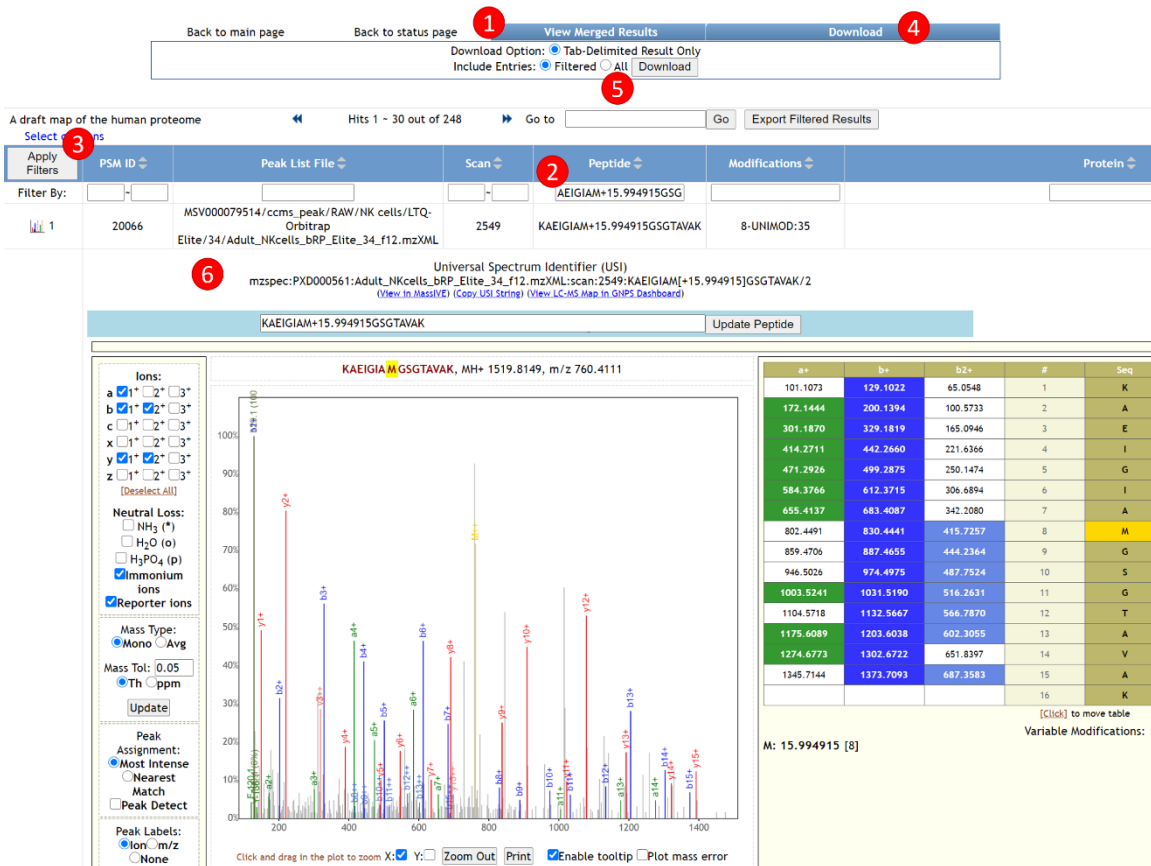

Figure S3. MassIVE functionality for exporting Universal Spectrum Identifiers for subsets of identified spectra, as is commonly important for identifications of modified peptides. This example illustrates how to export USIs for all identifications with an oxidized methionine on sequence AEIGIAMGSGTAVAK in one of the original human draft proteome datasets. Starting with “Browse Results” in the [MassIVE dataset page for PXD000561](#), the figure illustrates that (1) clicking View Merged Results shows all identifications in the dataset, regardless of the number of separate searches; (2) entering a filter string in the Peptide field and (3) clicking Apply Filters selects all spectrum identifications matching the filter text; (4) clicking the Download tab and (5) selecting to download Filtered results produces a TSV file with all USIs for all filtered results that can be submitted with a manuscript to support the review process for the manuscript associated with a dataset. In addition, (6) USIs are also show for every row in the filtered results when clicking on the spectrum icon (leftmost column) to visualize the spectrum identification. The same results can also be communicated and accessed directly using [the same URL](#) that was used to generate this figure.

Search Spectra

USI  Search

Examples: YYWGGLYSWDMASK USI for YYWGGLYSWDMASK [What is USI?](#)

PSM

| Accession                          | Peptide Sequence      | Decoy | PSM-level FDR | PrecursorMZ        | Charge | Pass submitter Threshold | Validated by PRIDE | More |
|------------------------------------|-----------------------|-------|---------------|--------------------|--------|--------------------------|--------------------|------|
| <input type="checkbox"/> PXD019317 | YEEASSK               | false | 8.086e-1      | 452.92718505859375 | 3      | ✓                        | ✗                  |      |
| <input type="checkbox"/> PXD019317 | YMKYEKSYR             | false | 8.086e-1      | 603.33740234375    | 3      | ✓                        | ✗                  |      |
| <input type="checkbox"/> PXD019317 | YLCTFGPNGWNSSIK       | true  | 7.556e-1      | 581.94873046875    | 3      | ✓                        | ✗                  |      |
| <input type="checkbox"/> PXD019317 | YAYYVCYKCR            | false | 8.086e-1      | 663.346923828125   | 3      | ✓                        | ✗                  |      |
| <input type="checkbox"/> PXD019317 | YKHKRPS               | true  | 7.179e-1      | 666.435791015625   | 3      | ✓                        | ✗                  |      |
| <input type="checkbox"/> PXD019317 | YKEHEDGYMR            | false | 7.869e-1      | 624.3232421875     | 3      | ✓                        | ✗                  |      |
| <input type="checkbox"/> PXD019317 | YAAMVTCMIDEAVRNTWALKR | false | 8.086e-1      | 834.4216918945312  | 3      | ✓                        | ✗                  |      |
| <input type="checkbox"/> PXD019317 | YGRCKCR               | true  | 8.086e-1      | 547.632080078125   | 3      | ✓                        | ✗                  |      |

Total 543205140 items < 1 2 3 ... 27160257 > 20/page

Figure S4. PRIDE Archive Spectra (<https://www.ebi.ac.uk/pride/archive/spectra>) provides access to millions of PSMs.

**PRIDE Archive**  
Proteomics Identifications Database

Home Resources Tools Docs About Log In Register

Search Spectra

Peptide  Search

Examples: YYWGGLYSWDMASK USI for YYWGGLYSWDMASK [What is USI?](#)

PSM

| Accession                          | Peptide Sequence | Decoy | PSM-level FDR | PrecursorMZ | Charge | Pass submitter Threshold | Validated by PRIDE | More |
|------------------------------------|------------------|-------|---------------|-------------|--------|--------------------------|--------------------|------|
| <input type="checkbox"/> PXD012039 | WQLVGITSWGEGCAR  | false | 1.693e-4      | 860.41766   | 2      | ✓                        | ✗                  |      |
| <input type="checkbox"/> PXD012039 | WQLVGITSWGEGCAR  | false | 2.125e-4      | 573.94788   | 3      | ✓                        | ✗                  |      |
| <input type="checkbox"/> PXD012039 | WQLVGITSWGEGCAR  | false | 2.349e-4      | 860.41632   | 2      | ✓                        | ✗                  |      |
| <input type="checkbox"/> PXD012039 | WQLVGITSWGEGCAR  | false | 1.511e-4      | 860.4165    | 2      | ✓                        | ✗                  |      |
| <input type="checkbox"/> PXD012039 | WQLVGITSWGEGCAR  | false | 1.626e-4      | 860.41614   | 2      | ✓                        | ✗                  |      |
| <input type="checkbox"/> PXD012039 | WQLVGITSWGEGCAR  | false | 1.756e-4      | 860.41797   | 2      | ✓                        | ✗                  |      |

Figure S5. Screenshot showing the result from searching for the peptide sequence WQLVGITSWGEGCAR.

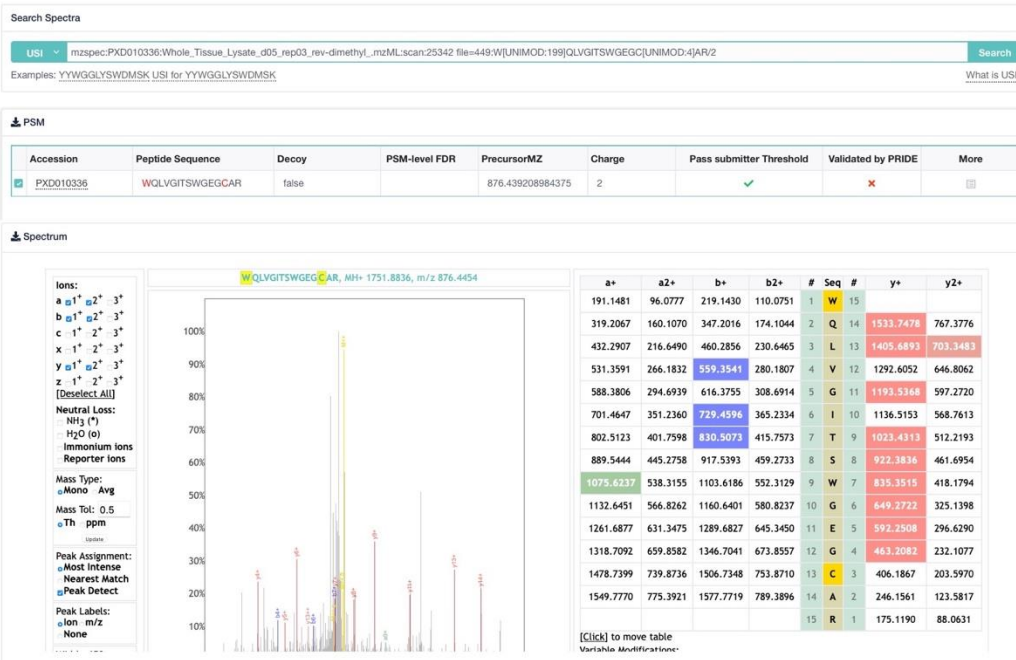

Figure S6. Screenshot showing the mass spectrum corresponding to the selected PSM (peptide sequence WQLVGITSWGEGCAR in dataset PXD010336).
